# Supplementary material
Source: PubMed Central journal article supplement (PMC4881776)

# Induced Apoptosis Investigation in Wild-Type and FLT3-ITD Acute Myeloid Leukemia Cells by Nanochannel Electroporation and Single Cell qRT-PCR

## Supplementary Materials

Figure S1. Endogenous level of MCL1 mRNA in MV4-11 cells and KG1a cells. Standard curves for qRT-PCR and MCL1 mRNA baseline in KG1a and MV4-11 cells (a) and distribution of MCL1 mRNA among individual cells in MV4-11 and KG1a cells (b).

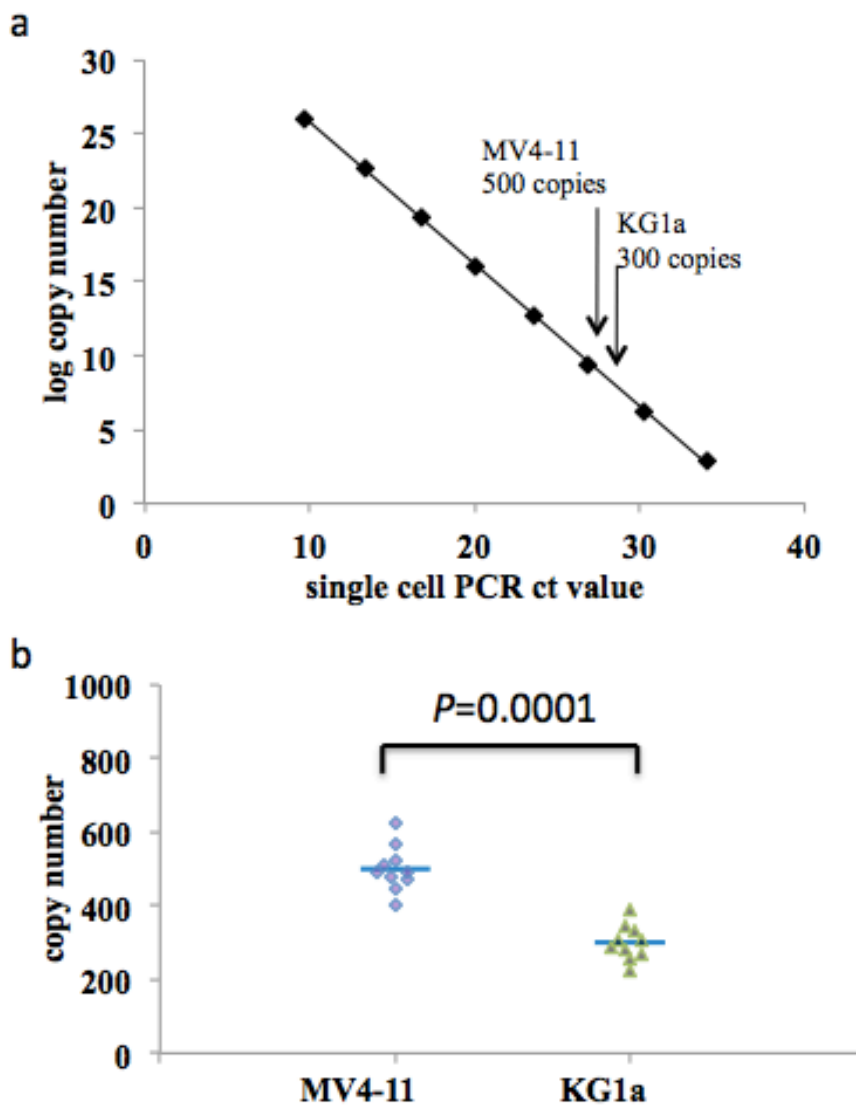

Supplement: mt20166x1.pdf [file mt20166x1.pdf]
